1 **p16-3MR: a novel model to study cellular senescence in cigarette smoke-**  
2 **induced lung injuries during aging**

3  
4 Gagandeep Kaur<sup>1</sup>, Isaac K. Sundar<sup>1</sup>, and Irfan Rahman<sup>1, \*</sup>  
5  
6

7 <sup>1</sup>Department of Environmental Medicine, University of Rochester Medical Center,  
8 Rochester, NY  
9  
10  
11  
12  
13

14 \*Correspondence should be addressed to:

15 Irfan Rahman, Ph.D.  
16 Department of Environmental Medicine  
17 University of Rochester Medical Center  
18 Box 850, 601 Elmwood Avenue  
19 Rochester 14642, NY, USA  
20 Tel: 1 585 275 6911  
21 E-mail: [irfan\\_rahman@urmc.rochester.edu](mailto:irfan_rahman@urmc.rochester.edu)  
22  
23  
24  
25

26 **Short running title:** p16-3MR as model for cellular senescence in lung diseases

27 **ABSTRACT**

28 Cellular senescence and lung aging are associated with the pathogenesis of Chronic Obstructive  
29 Pulmonary Disease (COPD). COPD progresses with aging, and chronic smoking is the key  
30 susceptibility factor in lung pathological changes concurrent with biological aging. However,  
31 these processes involving cigarette smoke (CS)-mediated lung cellular senescence are difficult  
32 to distinguish. One of the impediments to study cellular senescence in relation to age-related  
33 lung pathologies is the lack of a suitable *in vivo* model. In view of this, we provide evidence  
34 that supports the suitability of p16-3MR mice to study cellular senescence in CS-mediated and  
35 age-related lung pathologies. p16-3MR mice has a trimodal reporter fused to the promoter of  
36 p16<sup>INK4a</sup> gene that enables detection, isolation and selective elimination of senescent cells, thus  
37 making it a suitable model to study cellular senescence. To determine its suitability in CS-  
38 mediated lung pathologies, we exposed young (12-14 months) and old (17-20 months) p16-  
39 3MR mice to 30-day CS exposure and studied the expression of senescent genes (p16, p21 and  
40 p53) and SASP-associated markers (MMP9, MMP12, PAI-1, and FN-1) in air- and CS-exposed  
41 mouse lungs. Our results showed that this model could detect cellular senescence using  
42 luminescence and isolate cells undergoing senescence with the help of tissue fluorescence in  
43 CS-challenged young and old mice. Our results from the expression of senescence markers and  
44 SASP-associated genes in CS-challenged young and old p16-3MR mice were comparable with  
45 increased lung cellular senescence and SASP in COPD. We further showed age-dependent  
46 alteration in the (i) tissue luminescence and fluorescence, (ii) mRNA and protein expressions  
47 of senescent markers and SASP genes, and (iii) SA- $\beta$ -gal activity in CS-challenged young and  
48 old p16-3MR mice as compared to their air controls. Overall, we showed that p16-3MR is a  
49 competent model to study cellular senescence in age-related pathologies and could help  
50 understand the pathobiology of cellular senescence in lung conditions like COPD and fibrosis.

51 **Keywords:** p16, cellular senescence, SASP, cigarette smoke, and COPD

## 52 INTRODUCTION

53 Cigarette smoke (CS) can cause DNA damage and cellular senescence, leading to premature  
54 lung aging<sup>1-4</sup>. Reports prove a critical role of cigarette smoke-induced cellular senescence in  
55 the development of Chronic Obstructive Pulmonary disease (COPD) or emphysema<sup>3,5-7</sup>.  
56 Markers of senescence, including p16 and p21, are shown to be upregulated in both the airway  
57 epithelium and endothelium of lung specimens from patients with COPD, thus proving that  
58 cellular senescence has an important role in the pathophysiology of COPD<sup>3,6,8</sup>. Cellular  
59 senescence refers to the state of irreversible cell cycle arrest in somatic cells in response to  
60 intrinsic stressors (DNA damage) or extrinsic stressors (oxidative stress)<sup>9</sup>. Unlike cells that  
61 have undergone apoptosis, senesced cells remain metabolically active and continue to affect  
62 their surrounding cells after having undergone specific phenotypic changes themselves. One of  
63 these phenotypic changes is an increased production of extracellular vesicles and an increased  
64 secretion of inflammatory cytokines and interleukins. Changes in the secretory profile of a  
65 senescent cell reshapes not only its microenvironment, but also that of its surrounding cells,  
66 and is termed as senescence-associated secretory phenotype (SASP)<sup>9,10</sup>. SASP has been shown  
67 to be linked to chronic inflammation, which is a ubiquitous component of aging tissues and  
68 most age-related diseases including COPD and Idiopathic pulmonary fibrosis (IPF)<sup>10-12</sup>.  
69 Mounting evidence proves that the elimination of these senescent cells can prevent the  
70 development and/or exacerbation of certain age-related pathologies<sup>13-17</sup>.

71

72 The major impediment in studying the role of senescent cells in age-related pathologies is the  
73 lack of a suitable reporter model. To overcome this limitation, Demaria et al. created a novel  
74 mouse model p16-3MR which can (a) detect senescent cells in living animals, (b) enable the  
75 isolation of senesced cells from mouse tissues, and (c) eliminate senescent cells upon treatment  
76 with a drug otherwise ineffective in wild-type mice. p16-3MR mice carries a transgene

77 consisting of a trimodal reporter under the regulation of a p16 promoter<sup>18</sup>. p16 is a tumour  
78 suppressor gene involved in regulating cellular senescence, specifically through its induction  
79 of G1 cell cycle arrest by inhibiting cyclin-dependent kinases<sup>3,19</sup>. Theoretically, p16-3MR is a  
80 useful model for studying cellular senescence in various age-related pathologies<sup>15-17</sup>; however,  
81 to our knowledge, this model's efficacy in studying lung pathologies induced by cigarette  
82 smoke exposure has not been tested.

83

84 Considering this, we studied the suitability of using p16-3MR as a model to study cellular  
85 senescence in cigarette smoke-induced pulmonary pathologies. Previous reports by our group  
86 have shown that chronic exposure to cigarette smoke induced the upregulation of cellular  
87 senescence as well as the expression of p16 in C57BL/6J mice, independent of age<sup>20</sup>. In this  
88 study, we determined whether p16-3MR reporter mice could be used to study the role of lung  
89 cellular senescence in the pathophysiology of COPD. We analysed the changes in the  
90 expression of SASP markers following 30-day CS exposure in both young and old p16-3MR  
91 mice. Using In Vivo Imaging System (IVIS) and fluorescence microscopy of lung tissues we  
92 show that p16-3MR mice can be successfully used to visualize and isolate senescent cells from  
93 the lungs of CS-exposed mice.

94

## 95 **RESULTS**

96 **Sub-chronic CS exposure augments luminescence indicative of p16 expression in the**  
97 **lungs of p16-3MR reporter mice.** p16-3MR mice are unique model designed to study cellular  
98 senescence by the fusion of senescence-sensitive promoter of p16<sup>INK4a</sup> and its adjacent gene  
99 p19<sup>Arf</sup> with a trimodal reporter constituting of functional domains for LUC (Renilla  
100 Luciferase), mRFP (monomeric red fluorescent protein) and HSV-TK (truncated herpes  
101 simplex virus 1 thymidine kinase). We tested the suitability of this model to study CS-induced

102 cellular senescence by exposing young and old p16-3MR mice to sub-chronic CS and harvested  
103 the lung tissues. The 3MR-expressing cells were first detected using luminescence in the lung  
104 tissues from air- and CS-exposed young and old mice. Our results demonstrated a significant  
105 increase in the lung tissue luminescence following sub-chronic CS exposure (30 days) in young  
106 p16-3MR mice as compared to their older counterparts. However, the augmentation in cellular  
107 senescence, as indicated by the increase in tissue luminescence, was not significant in old p16-  
108 3MR mice following 30-day CS-challenge (**Figure 1**).

109

110 **Sub-chronic exposure to CS results in a significant increase in the mRFP expression in**  
111 **the lungs of young p16-3MR mice.** To sort the tissues/cells undergoing cellular senescence,  
112 we tested the mRFP fluorescence and expression in the lung tissues from both CS-challenged  
113 young and old p16-3MR mice. We first employed IVIS imaging to measure the mRFP  
114 fluorescence in air- and CS-exposed lungs from younger and older groups of p16-3MR mice.  
115 Our results showed a significant increase in the lung tissue fluorescence (mRFP) on CS-  
116 challenge in both age groups, but we observed a lot of background signal in our samples  
117 (**Figure 2**). We suspect that this auto-fluorescence was due to the possibility of CS-induced tar  
118 deposition in the lung during sub-chronic CS exposure. Thus, we measured the tissue  
119 fluorescence in the lung tissue sections from air/CS-exposed young and old p16-3MR mice.  
120 Our investigations showed a pronounced upregulation in mRFP expression of CS-challenged  
121 young p16-3MR mice relative to their respective age-related air controls. Contrarily, the  
122 increase in the mRFP expression in the lungs of CS-challenged old p16-3MR was not  
123 significant (**Figure 3a**). Furthermore, mRNA expression analyses for mRFP expression  
124 correlated with our previous findings, further substantiating our results (**Figure 3b**).

125

126 **Increased expression of cellular-senescence markers (p16 and p21) following sub-chronic**  
127 **CS exposure in young p16-3MR mice.** To further confirm our findings, we next determined  
128 the expression of the markers of cellular senescence p16 and p21 in our study model at both  
129 transcriptional and translational levels. The mRNA levels of senescence markers p16<sup>INK4a</sup> and  
130 p21 were significantly upregulated in young CS-exposed p16-3MR mice, confirming the  
131 presence of senescent cells following sub-chronic CS exposure (**Figure 4a**). Immunoblotting  
132 results supported the findings from the aforementioned mRNA expression, further  
133 substantiating our claims (**Figure 4b**). Contrarily, as expected, we did not find a significant  
134 increase in mRNA or protein expression of p16<sup>INK4a</sup> in older CS-challenged mice as compared  
135 to their age-related air controls (**Figure 4a&b**). In fact, the protein expression of p16 was  
136 reduced on CS-exposure in older p16-3MR mice (**Figure 3b**). This finding was not surprising  
137 due to the baseline expression of p16<sup>INK4a</sup> gene for the air-controls being elevated in the older  
138 mice, thus conferring with the normal age-related process. Interestingly, despite observing a  
139 significant increase in the mRNA expression of the p21 gene in both young and old CS-exposed  
140 mice, we demonstrated a marked decrease in its protein expression in older CS-exposed mice  
141 relative to their respective air control (**Figure 4a&b**).

142

143 **Age-dependent changes in the mRNA and protein expression of SASP-associated genes**  
144 **in CS exposed p16-3MR mice.** To determine the age-related changes in the protein expression  
145 of various SASP-associated proteins, we studied the expression of MMP12, MMP9, FN-1,  
146 PAI-1 and p53 in air- and CS-exposed younger and older p16-3MR mice. Consistent with the  
147 gene expression studies performed by our groups, we found a significant age-independent  
148 increase in the mRNA expression of MMP12 (**Figure 5**). However, the protein expression data  
149 did not show any notable variation in the expression of MMP12 in the lung of air- or CS-  
150 exposed young and old p16-3MR groups. In addition, no significant change in the expression

151 of MMP9 was observed in response to sub-chronic CS exposure in young and old groups of  
152 p16-3MR mice, thus suggesting no changes in the extracellular matrix (ECM) composition on  
153 CS (30 day) exposure (**Figure 5**).

154

155 We further demonstrated a pronounced upregulation in the expression of PAI-1, a marker for  
156 lung cell senescence, in CS-exposed young p16-3MR mice (**Figure 5**). Similarly, p53  
157 expression was also markedly augmented in CS exposed young mice, but not in old p16-3MR  
158 mice (**Figure 6**). Though not significant, the expression of both PAI-1 and p53 were decreased  
159 in CS exposed older p16-3MR mice thus showing an age-dependent regulation of cellular  
160 senescence (**Figures 5&6**). Contrary to these, the expression of FN-1 showed slight variations  
161 in CS-exposed young and old p16-3MR mice, but none of these changes were significant  
162 (**Figure 5**). We did not observe any change in the expression of inflammatory subunits of NF-  
163  $\kappa$ B (p50/p105) on sub-chronic CS exposure in both young and old p16-3MR mice (**Figure 6**).

164

165 We further studied the mRNA expression of other SASP-related genes IL-1 $\alpha$ , CCL2, IL-6 and  
166 CCL5 in CS-exposed young and old p16-3MR mice. Our results demonstrated age-dependent  
167 increase in the expression of IL-6 and CCL2 in CS-exposed mice as compared to the air  
168 controls. The expression of IL-1 $\alpha$  was also significantly increased in CS-exposed young and  
169 old mice, while no change was observed in the expression of CCL5 in response to sub-chronic  
170 CS exposure (**Figure 7**).

171

172 To further assess the senescence-mediated induction of pro-inflammatory markers on CS  
173 exposure (30 days), we measured the levels of pro-inflammatory cytokines/chemokines in the  
174 blood plasma of air- and CS-exposed young and old p16-3MR mice using Luminex multiplex

175 assay. Interestingly, we observed a significant increase in the levels of eotaxin and IL-17A in  
176 CS-exposed older p16-3MR mice (**Figure 8a**).

177

178 **Sub-chronic CS exposure contributes towards the augmentation of SA- $\beta$ -gal activity in**  
179 **the lungs of p16-3MR mice.** Considering that the SA- $\beta$ -gal activity (lysosomal) is a marker  
180 of cellular senescence, we measured the SA- $\beta$ -gal activity in the lung homogenates of air- and  
181 CS-exposed younger and older p16-3MR mice. We observed an age-independent augmentation  
182 of SA- $\beta$ -gal activity in the CS-exposed young and old mice (**Figure 8b**). Collectively, these  
183 results show that the characteristic of aging itself is involved in lung cellular senescence  
184 program/process, but does not increase the susceptibility of CS-induced cellular senescence in  
185 lung aging using a mouse model of COPD.

186

## 187 **DISCUSSION**

188 Cellular senescence is a complex response towards stress where originally proliferating cells  
189 lose their power to proliferate. It is known to play an important role in two disparate processes  
190 tumorigenesis and aging. Mounting evidence suggests that the senescence-induced growth  
191 arrest acts as a barrier towards tumor growth. However, accumulation of senescent cells can  
192 also drive aging-associated pathologies. Therefore, cellular senescence is the prime example  
193 of evolutionarily antagonistic pleiotropic response, which is beneficial at young age but  
194 deleterious at older ages <sup>9,18,21</sup>.

195 Many cigarette smoke (CS)-related pathologies show exacerbating symptoms at older age <sup>22-</sup>  
196 <sup>24</sup>. Reports suggest that cellular senescence is responsible for aggravating disease symptoms in  
197 pathologies like asthma, COPD, and pulmonary fibrosis <sup>6,25-27</sup>. In fact, cigarette smoke has been  
198 shown to cause DNA damage leading to premature and accelerated lung aging that ultimately  
199 leads to the development of COPD <sup>27,28</sup>. However, the exact role of senescence in development



200 of these lung pathologies is not completely understood. One of the hindrances in this regard is  
201 the lack of a suitable reporter model to study lung cellular senescence, though several models  
202 are proposed which have their own pros and cons<sup>19,29-32</sup>. To overcome this hindrance, Demaria  
203 et al., (2014) generated a mouse model named p16-3MR that was shown to effectively identify,  
204 isolate and selectively eliminate senescent cells<sup>18</sup>.

205

206 In this reporter mouse model, the senescence-sensitive promoter of p16<sup>INK4a</sup> and its adjacent  
207 p19<sup>Arf</sup> genes were inactivated and integrated in the BAC (bacteria artificial chromosome) with  
208 a 3MR transgene. This 3MR transgene encoded three fusion protein made up of luciferase  
209 (LUC), monomeric red fluorescent protein (mRFP), and Herpes Simplex Virus thymidine  
210 kinase (HSV-TK) allowing identification, sorting and selective elimination of senescent cells,  
211 respectively<sup>18</sup>. In the current study, we assessed the suitability of this model to study lung  
212 cellular senescence in cigarette smoke-related pathologies. We exposed young (12-14 months)  
213 and old (17-20 months) p16-3MR mice to CS for the duration of 30 days. Thereafter, we  
214 assessed the expression of senescent markers and SASP-related genes in the lungs of control  
215 and treatment groups.

216

217 On studying the tissue luminescence in lung tissues using IVIS imaging, we found a CS-  
218 induced upregulation of p16 expression indicative of increase in tissue luminescence which  
219 was significant amongst young mice. Considering that luminescence indicates cellular  
220 senescence in this model, we were effectively able to show premature induction of senescence  
221 in CS-exposed young mice in our study.

222

223 We next studied the mRFP expression in lung tissue sections using fluorescence microscopy  
224 to track the senescent cells. Our results further substantiated our previous finding thus showing

225 that this model could effectively be used to track the CS-induced senescent cell using  
226 fluorescence. It is pertinent to mention here that we were unable to use tissue fluorescence to  
227 identify mRFP expression in the lung tissues from air- and CS-exposed young and old p16-  
228 3MR mice. IVIS imaging results showed excessive fluorescence in the whole-lung for CS-  
229 exposed group, which could be an outcome of auto fluorescence due to tar deposition on CS  
230 inhalation in these animals. We thus demonstrated that IVIS imaging cannot be used to study  
231 senescence-induced tissue fluorescence in p16-3MR mice. However, our fluorescence  
232 microscopy and qPCR results were able to identify CS-induced senescence in our mouse  
233 model. In fact, future studies could use immunohistochemical staining to identify the specific  
234 cell types undergoing cellular senescence following chronic CS exposure.

235

236 We further confirmed CS-induced senescence by increased (a) transcript levels (mRNA) and  
237 protein expression of senescent markers p16 and p21, (b) mRNA levels of SASP factors- IL-  
238 1 $\alpha$ , IL-6, CCL2 and MMP12, and (c) SA- $\beta$ -gal activity assay in CS exposed group as compared  
239 to air controls. Our results are comparable to our previous studies <sup>20</sup>, thus proving that the  
240 results obtained using this model are translatable.

241

242 Since cigarette smoke-induced emphysema results in tissue remodeling and ECM proteins we  
243 further tested the expression of matrix metalloproteinases (MMP9 and MMP12), tissue plasmin  
244 regulators (PAI-1) and ECM glycoprotein (FN-1) on 30 days CS-exposed young and old p16-  
245 3MR mice. Though not significant, our results demonstrate age-dependent dysregulation in the  
246 MMP9 protein expression in CS-exposed mice as compared to the air controls. Contrarily, we  
247 found significant increase in the levels of plasminogen activator inhibitor (PAI)-1 in CS-  
248 exposed young p16-3MR mice as compared to air-exposed control mice. Dysregulated levels  
249 of MMPs and its inhibitors has been associated with abnormal tissue repair in conditions like

250 fibrosis and asthma<sup>33-35</sup>. Thus, our results show that this model is effective in simulating  
251 conditions leading to ECM deposition and fibrinolysis on CS exposure which is similar to that  
252 found in human<sup>33</sup>. Since ours was sub-chronic (30 days CS exposure) study, we could not find  
253 conditions leading to emphysematous lungs, but our current findings prove the efficacy of this  
254 model to mimic conditions of acute and chronic exposure to cigarette smoke *in vivo*.

255

256 Interestingly, we observed age-dependent changes in the expression of many proteins  
257 associated with inflammation and senescence, like, p53, IL-17A, eotaxin, on CS-exposure in  
258 our mouse model. These findings show that age plays a key role in regulating the disease  
259 phenotypes in cigarette smoke-associated disorders. In fact, the role of several proteins might  
260 vary depending on the age and duration of exposure that will be studied in the future. In the  
261 past few decades, the possibility of using senolytic drugs to combat against age-associated  
262 disorders is being considered<sup>15-18,36</sup>. Given that this model can selectively target senescent cells  
263 by the use of Ganciclovir, it will be interesting how the elimination of senescence affects  
264 smoking-induced molecular changes *in vivo*. We intend to determine this possibility in our  
265 upcoming studies.

266

267 Overall, in the current study, we proved that the *in vivo* mouse model for cellular senescence  
268 using p16-3MR reporter mice could be used to study smoking-induced age-related pathologies  
269 like COPD and IPF. In general, this is the first attempt to utilize p16-3MR as a senescence  
270 model in lung pathologies (**Figure 9**). Future studies are required with a greater focus on using  
271 the p16-3MR model to discern the role of lung cellular senescence in the progression of aging  
272 and exosome-induced conditions like COPD as well as to test whether the removal of senescent  
273 cells causes any alleviation in the disease phenotype. Nevertheless, use of this model will help

274 to deduce the cross-talk between cellular senescence and inflammation in smoking-associated  
275 pulmonary conditions to identify effective therapies in the future.

276

## 277 **METHODS**

### 278 **Ethics statement and scientific rigor/reproducibility**

279 All animal experiments were performed according to the standards established by the U.S.  
280 Animal Welfare Act as per the NIH guidelines. The University Committee on Animal Research  
281 at the University of Rochester approved the animal protocols described below. Great precaution  
282 was taken in employing a robust and unbiased approach during the experimental and  
283 corresponding results analysis phase in order to ensure reproducibility befitting NIH standards.  
284 The key biological and chemical resources used in this study are of scientific standard and have  
285 been authenticated and revalidated. Unless stated otherwise, all biochemical reagents were  
286 purchased from Millipore Sigma (St. Louis, MO, USA). The antibodies listed in the study were  
287 commercial grade and were validated by their respective manufacturers.

288

### 289 **p16-3MR mouse model**

290 We obtained the p16-3MR mice from Dr. Judith Campisi of the Buck Institute for Research on  
291 Aging via the Unity Biotechnology, Inc, San Francisco, CA for conducting our experiments.  
292 p16-3MR mice are diploid for p16<sup>INK4a</sup> and p19<sup>Arf</sup> with a trimodal (3MR) reporter fusion  
293 protein designed to identify, isolate, and selectively kill senescent cells<sup>18</sup>. We used these mice  
294 upon genotyping to test the suitability of this model for studying cellular senescence in cigarette  
295 smoke exposure-related lung pathologies. Animals that have undergone cellular senescence  
296 show an increased expression of p16. These senesced cells could be identified with  
297 luminescence and red fluorescence protein (RFP) and selectively eliminate senescent cells by  
298 treatment with Ganciclovir in the p16-3MR mice model. All the mice were housed in the

299 vivarium facility at the University of Rochester Medical Center with a 12-hour light/12-hour  
300 dark cycle (lights on at 6:00 am). All the animals used in the study were genotyped prior to CS  
301 exposure.

302

### 303 **Sub-Chronic CS exposure**

304 Male and female mice of different age-groups (12–14 months and 17–20 months) were exposed  
305 to sub-chronic cigarette smoke generated by research grade cigarettes (3R4F) according to the  
306 Federal Trade Commission protocol (1 puff/min of 2-s duration and 35-ml volume for a total  
307 of 8 puffs at a flow rate of 1.05 L/min) with a Baumgartner-Jaeger CSM2072i automatic CS  
308 generating machine (CH Technologies, Westwood, NJ)<sup>37,38</sup>. The mainstream smoke exposure  
309 was performed at a concentration of ~250–300 mg/m<sup>3</sup> total particulate matter (TPM) by  
310 adjusting the flow rate of the diluted medical air, and the level of carbon monoxide in the  
311 chamber measured at ~350 ppm, as described previously<sup>37</sup>. At the end of the exposure, 12–14  
312 months old mice were referred to as “young,” whereas 17-20 months old were termed “old”  
313 mice. We will use the same terms to denote these two groups in the rest of this manuscript.  
314 Mice that were not exposed to CS were considered the “Air” group and kept in filtered air,  
315 which served as the control group in these experiments. 24 h following the final exposure, all  
316 the mice were euthanized and their lung tissues were used for imaging, biochemical and  
317 immunohistochemical analyses.

318

### 319 **Tissue Luminescence and Fluorescence using IVIS Imaging**

320 To identify senescent cells using luminescence, lung tissues harvested from euthanized mice  
321 were soaked for 10 min in pre-warmed (37°C) PBS with 2% FBS and a 1:10 dilution of  
322 Xenolight RediJect Coelenterazine h (Cat# 706506, Perkin Elmer, Waltham, MA). Following  
323 a 12-15 min incubation, tissues were transferred to a fresh 35-mm dish and luminescence was

324 measured using the IVIS® Spectrum multispectral imaging instrument (Caliper Life Sciences,  
325 Inc. - Hopkinton, MA). IVIS® Spectrum multispectral imaging instrument was also used to  
326 measure the lung tissue fluorescence (RFP) in our control and experimental groups at an  
327 excitation maximum of 535 nm and emission maximum of 580 nm.

328

### 329 **Fluorescence microscopy in Lung Tissue section**

330 Fluorescence imaging was employed to determine mRFP expression in the lung tissue sections  
331 from CS- and air-exposed mice. More specifically, non-lavaged mouse lungs were inflated with  
332 50% solution of Optimal Cutting Temperature (OCT) compound and 10 µm frozen sections  
333 were cut using a rotary microtome-cryostat. Immediately after sectioning, samples were fixed  
334 and mounted using Prolong (Cat# P36962, Life technologies Corporation, Eugene, OR) with  
335 DAPI. Images were acquired using Nikon Eclipse Ni-U fluorescence microscope at 200×  
336 magnification using Advance SPOT software.

337

### 338 **mRNA expression analyses using qPCR**

339 Reverse-Transcriptase Polymerase Chain Reaction (RT-PCR) was performed to determine the  
340 differential expression of cellular senescence genes in our experimental groups. Briefly, RNA  
341 was isolated from the lung tissue using RNeasy miniprep kit (Qiagen, Valencia, CA, USA).  
342 RNA quantity and quality were assessed using Nanodrop 1000 spectrophotometer (Thermo  
343 Fisher Scientific) and 1 µg of total RNA was used for cDNA conversion using the RT2 first  
344 strand kit (Cat# 330404, Qiagen, Valencia, CA, USA). The prepared cDNA was diluted and  
345 used to determine the expression of genes of interest using specific primers. All of the real-  
346 time PCR reactions were performed with RT2 SYBR Green/ROX PCR Master Mix (Cat#  
347 330503, Qiagen, Valencia, CA, USA) and relative mRNA expression of each gene was  
348 determined using CFX96 real-time system (Bio-Rad, Hercules, CA). Differential expression

349 of target genes in total RNA isolated from air- and CS-exposed lung tissues from young and  
350 old p16-3MR mice were expressed as relative fold change. 18S rRNA was used as  
351 housekeeping control. Fold-Change ( $2^{(-\Delta\Delta Ct)}$ ) is the normalized gene expression  
352 ( $2^{(-\Delta Ct)}$ ) in the CS exposed group (Treated) divided by the normalized gene expression  
353 ( $2^{(-\Delta Ct)}$ ) in the Air group (Control) <sup>39,40</sup>. The sequence of the primers used for  
354 amplification is provided in Supplementary file Table 1.

355

### 356 **Immunoblot Analysis**

357 To determine the protein expression of various senescence-associated proteins, we employed  
358 immunoblotting. Briefly, one lobe of the lung tissue (~40 mg) was homogenized (Pro 200  
359 homogenizer, at maximum speed, 5th gear for 40 seconds) in 0.3 mL of ice-cold RIPA buffer  
360 containing complete protease inhibitor cocktail (Cat# 78444, Thermo Scientific, Waltham,  
361 MA). The tissue homogenate was incubated on ice for one hour to allow complete cell lysis.  
362 Following this incubation, the homogenate was centrifuged at 13,000g for 30 minutes at 4°C.  
363 The supernatant was aliquoted and stored at -80°C until further analyses. A small fraction of  
364 the tissue lysate was taken and diluted for protein analysis with the help of bicinchoninic acid  
365 (BCA) colorimetric assay (Thermo Scientific, Waltham, MA) where BSA was used as a  
366 standard.

367

368 Equal amounts of protein from each sample (20 µg) was resolved on a sodium dodecyl sulfate  
369 (SDS)-polyacrylamide gel and subsequently electroblotted onto nitrocellulose membranes. The  
370 nitrocellulose membranes were then blocked using 5% milk solution for one hour at room  
371 temperature. Thereafter, the membranes were probed with antibodies targeted for the protein  
372 of interest. Antibodies towards anti-p16 (Cat# sc-377412, Santa Cruz Biotechnology, Dallas,  
373 TX), anti-p21 (Cat# 556430, BD Biosciences, San Jose, CA), anti-Fn1 (Cat# ab2413), anti-PAI-

374 1 (Cat# ab66705), anti-NF- $\kappa$ B(Cat# ab32360), anti-MMP9 (Cat# ab38898) (Abcam,  
375 Cambridge, UK), anti-MMP12 (Cat# NBP2-67344, Novus Biologicals, Littleton, CO), anti-  
376 p53 (Cat# 2524, Cell Signaling, Danvers, MA) and anti- $\beta$ -actin (Cat# 12620, Cell Signaling,  
377 Danvers, MA) were added using a 1:1000 dilution (in 5% BSA in tris-buffered saline [TBS]  
378 containing 0.1% Tween 20) and incubated overnight at 4°C. The following day, blots were  
379 washed three times with 1X TBST and probed with the appropriate anti-rabbit (Cat# 170-6515,  
380 Bio-Rad, Hercules, CA) or anti-mouse (Cat# 7076, Cell Signaling, Danvers, MA) secondary  
381 antibody (1:3000 dilution in 5% milk) for one hour. Chemiluminescence was detected through  
382 the Bio-Rad ChemiDoc MP Imaging system using the SuperSignal West Femto Maximum  
383 Sensitivity Substrate (Cat# 34096, Thermo Scientific, Waltham, MA). Bio-Rad Image Lab  
384 software was used for densitometric analyses. Corresponding band intensities for the proteins  
385 of interest were plotted as fold change relative to their respective  $\beta$ -actin loading control bands.

386

### 387 **Measurement of SA- $\beta$ -gal activity**

388 SA- $\beta$ -gal activity was measured using cellular senescence activity assay kit (Cat# ENZ-  
389 KIT129-0120, Enzo Life sciences, Farmingdale, NY) as per the manufacturer's protocol.  
390 Briefly, one lobe of the lung tissue (~40 mg) was homogenized (Pro 200 homogenizer) in 0.3  
391 mL of ice-cold 1X Cell lysis buffer containing complete protease inhibitor cocktail (Cat#  
392 78444, Thermo Scientific, Waltham, MA). Tissue homogenate was incubated on ice for 30 min  
393 and then centrifuged at 13,000 rpm for 15 min at 4°C. The supernatant was collected and stored  
394 until further analyses. 50 ml of cell lysate was mixed with 50 ul of assay buffer and incubated  
395 for 3 hours at room temperature. Following incubation, 50 ul of the reaction mixture was added  
396 to 200 ul of Stop solution and fluorescence was read using Cytation 5 (Biotek, Winooski, VA)  
397 at 360 nm (Excitation) / 465 nm (Emission).

398



399 **Assessment of pro-inflammatory mediators using Luminex**

400 The level of proinflammatory mediators in plasma (50  $\mu$ L) was measured with the help of Bio-  
401 Plex Pro Mouse Cytokine Standard 23-Plex (Cat# 64209360, Bio-Rad, Hercules, CA) as per  
402 manufacturer's protocol. Blood plasma was diluted two-folds and the levels of each  
403 cytokine/chemokine were expressed as pg/ml.

404

405 **Statistical analysis**

406 All statistical calculations were performed using GraphPad Prism 8.0. Data are expressed as  
407 mean  $\pm$  SEM. Pairwise comparisons were done using unpaired Student's *t*-test. For multi-group  
408 comparisons, one-way Analysis of Variance (ANOVA) with ad-hoc Tukey's test was  
409 employed. All animal experiments (n=4–5 mice/group) were performed twice. Differences  
410 were considered statistically significant at \**p* < 0.05, \*\**p* < 0.01, and \*\*\**p* < 0.001 when  
411 compared with respective air controls.

412

413 **Acknowledgments:** The National Institutes of Health (NIH) 1R01HL135613 R01 ES029177,  
414 HL137738 and R01 HL133404 supported this study. The funding body has no role in design  
415 of the study, data collection, analysis, and interpretation of data and in writing the manuscript.  
416 We thank Dr. Judith Campisi of the Buck Institute for Research on Aging via the Unity  
417 Biotechnology, Inc, San Francisco, CA for providing the p16-3MR strain for our research  
418 purposes. We thank Mr Shaiesh Yogeshwaran for his technical and editing help.

419

420 **Authors Contributions:** GK and ISK designed and conducted the experiments; IR conceived  
421 the concept and ideas; GK, ISK, and IR wrote and/or edited/revised the manuscript. IR obtained  
422 research funding.

423

## 424 **Declarations**

## 425 **Disclosures: Conflict of or competing interest statement**

426 The authors have declared that no competing interests exist.

## 427 **References**

- 428 1 Tuder, R. M., Kern, J. A. & Miller, Y. E. Senescence in chronic obstructive pulmonary disease.  
429 *Proceedings of the American Thoracic Society* **9**, 62-63, doi:10.1513/pats.201201-012MS  
430 (2012).
- 431 2 Karrasch, S., Holz, O. & Jörres, R. A. Aging and induced senescence as factors in the  
432 pathogenesis of lung emphysema. *Respiratory medicine* **102**, 1215-1230,  
433 doi:10.1016/j.rmed.2008.04.013 (2008).
- 434 3 Sundar, I. K., Rashid, K., Gerloff, J., Li, D. & Rahman, I. Genetic Ablation of p16(INK4a) Does  
435 Not Protect against Cellular Senescence in Mouse Models of Chronic Obstructive Pulmonary  
436 Disease/Emphysema. *American journal of respiratory cell and molecular biology* **59**, 189-199,  
437 doi:10.1165/rcmb.2017-0390OC (2018).
- 438 4 Lee, J., Sandford, A., Man, P. & Sin, D. D. Is the aging process accelerated in chronic obstructive  
439 pulmonary disease? *Curr Opin Pulm Med* **17**, 90-97, doi:10.1097/mcp.0b013e328341cead  
440 (2011).
- 441 5 Zhou, F., Onizawa, S., Nagai, A. & Aoshiba, K. Epithelial cell senescence impairs repair process  
442 and exacerbates inflammation after airway injury. *Respiratory research* **12**, 78,  
443 doi:10.1186/1465-9921-12-78 (2011).
- 444 6 Tsuji, T., Aoshiba, K. & Nagai, A. Alveolar cell senescence in patients with pulmonary  
445 emphysema. *American journal of respiratory and critical care medicine* **174**, 886-893,  
446 doi:10.1164/rccm.200509-1374OC (2006).
- 447 7 Nyunoya, T. *et al.* Cigarette smoke induces cellular senescence. *American journal of*  
448 *respiratory cell and molecular biology* **35**, 681-688, doi:10.1165/rcmb.2006-0169OC (2006).
- 449 8 Amsellem, V. *et al.* Telomere dysfunction causes sustained inflammation in chronic  
450 obstructive pulmonary disease. *American journal of respiratory and critical care medicine* **184**,  
451 1358-1366, doi:10.1164/rccm.201105-0802OC (2011).
- 452 9 Campisi, J. & d'Adda di Fagagna, F. Cellular senescence: when bad things happen to good cells.  
453 *Nature Reviews Molecular Cell Biology* **8**, 729-740, doi:10.1038/nrm2233 (2007).
- 454 10 Wallis, R., Mizen, H. & Bishop, C. L. The bright and dark side of extracellular vesicles in the  
455 senescence-associated secretory phenotype. *Mechanisms of ageing and development* **189**,  
456 111263, doi:10.1016/j.mad.2020.111263 (2020).
- 457 11 Franceschi, C. & Campisi, J. Chronic inflammation (inflammaging) and its potential  
458 contribution to age-associated diseases. *The journals of gerontology. Series A, Biological*  
459 *sciences and medical sciences* **69 Suppl 1**, S4-9, doi:10.1093/gerona/glu057 (2014).
- 460 12 Liu, R. M. & Liu, G. Cell senescence and fibrotic lung diseases. *Experimental gerontology* **132**,  
461 110836, doi:10.1016/j.exger.2020.110836 (2020).
- 462 13 van Deursen, J. M. The role of senescent cells in ageing. *Nature* **509**, 439-446,  
463 doi:10.1038/nature13193 (2014).
- 464 14 Childs, B. G. *et al.* Senescent cells: an emerging target for diseases of ageing. *Nat Rev Drug*  
465 *Discov* **16**, 718-735, doi:10.1038/nrd.2017.116 (2017).

- 466 15 Patil, P. *et al.* Systemic clearance of p16(INK4a) -positive senescent cells mitigates age-  
467 associated intervertebral disc degeneration. *Aging cell* **18**, e12927, doi:10.1111/accel.12927  
468 (2019).
- 469 16 Kim, H.-N. *et al.* Elimination of senescent osteoclast progenitors has no effect on the age-  
470 associated loss of bone mass in mice. *Aging cell* **18**, e12923-e12923, doi:10.1111/accel.12923  
471 (2019).
- 472 17 Rocha, L. R. *et al.* Early removal of senescent cells protects retinal ganglion cells loss in  
473 experimental ocular hypertension. *Aging cell* **19**, e13089, doi:10.1111/accel.13089 (2020).
- 474 18 Demaria, M. *et al.* An essential role for senescent cells in optimal wound healing through  
475 secretion of PDGF-AA. *Dev Cell* **31**, 722-733, doi:10.1016/j.devcel.2014.11.012 (2014).
- 476 19 Liu, J.-Y. *et al.* Cells exhibiting strong p16(INK4a) promoter activation in vivo display features  
477 of senescence. *PNAS* **116**, 2603-2611, doi:10.1073/pnas.1818313116 %J Proceedings of the  
478 National Academy of Sciences (2019).
- 479 20 Rashid, K., Sundar, I. K., Gerloff, J., Li, D. & Rahman, I. Lung cellular senescence is independent  
480 of aging in a mouse model of COPD/emphysema. *Scientific reports* **8**, 9023,  
481 doi:10.1038/s41598-018-27209-3 (2018).
- 482 21 Paez-Ribes, M., González-Gualda, E., Doherty, G. J. & Muñoz-Espín, D. Targeting senescent  
483 cells in translational medicine. *EMBO molecular medicine* **11**, e10234,  
484 doi:10.15252/emmm.201810234 (2019).
- 485 22 Ito, K. & Barnes, P. J. COPD as a disease of accelerated lung aging. *Chest* **135**, 173-180,  
486 doi:10.1378/chest.08-1419 (2009).
- 487 23 Selman, M., López-Otín, C. & Pardo, A. Age-driven developmental drift in the pathogenesis of  
488 idiopathic pulmonary fibrosis. *The European respiratory journal* **48**, 538-552,  
489 doi:10.1183/13993003.00398-2016 (2016).
- 490 24 Nash, S. H., Liao, L. M., Harris, T. B. & Freedman, N. D. Cigarette Smoking and Mortality in  
491 Adults Aged 70 Years and Older: Results From the NIH-AARP Cohort. *Am J Prev Med* **52**, 276-  
492 283, doi:10.1016/j.amepre.2016.09.036 (2017).
- 493 25 Schafer, M. J. *et al.* Cellular senescence mediates fibrotic pulmonary disease. *Nature*  
494 *communications* **8**, 14532, doi:10.1038/ncomms14532 (2017).
- 495 26 Wu, J. *et al.* Central role of cellular senescence in TSLP-induced airway remodeling in asthma.  
496 *PLoS One* **8**, e77795, doi:10.1371/journal.pone.0077795 (2013).
- 497 27 Brandsma, C. A. *et al.* Lung ageing and COPD: is there a role for ageing in abnormal tissue  
498 repair? *European respiratory review : an official journal of the European Respiratory Society*  
499 **26**, doi:10.1183/16000617.0073-2017 (2017).
- 500 28 Durham, A. L. & Adcock, I. M. The relationship between COPD and lung cancer. *Lung Cancer*  
501 **90**, 121-127, doi:10.1016/j.lungcan.2015.08.017 (2015).
- 502 29 Sorrentino, J. A. *et al.* p16INK4a reporter mice reveal age-promoting effects of environmental  
503 toxicants. *The Journal of clinical investigation* **124**, 169-173, doi:10.1172/jci70960 (2014).
- 504 30 Burd, Christin E. *et al.* Monitoring Tumorigenesis and Senescence In Vivo with a p16INK4a-  
505 Luciferase Model. *Cell* **152**, 340-351, doi:<https://doi.org/10.1016/j.cell.2012.12.010> (2013).
- 506 31 Omori, S. *et al.* Generation of a p16 Reporter Mouse and Its Use to Characterize and Target  
507 p16high Cells In Vivo. *Cell Metabolism* **32**, 814-828.e816,  
508 doi:<https://doi.org/10.1016/j.cmet.2020.09.006> (2020).
- 509 32 Folgueras, A. R., Freitas-Rodríguez, S., Velasco, G. & López-Otín, C. Mouse Models to  
510 Disentangle the Hallmarks of Human Aging. *Circulation research* **123**, 905-924,  
511 doi:10.1161/circresaha.118.312204 (2018).
- 512 33 Oh, C. K., Ariue, B., Alban, R. F., Shaw, B. & Cho, S. H. PAI-1 promotes extracellular matrix  
513 deposition in the airways of a murine asthma model. *Biochemical and biophysical research*  
514 *communications* **294**, 1155-1160, doi:[https://doi.org/10.1016/S0006-291X\(02\)00577-6](https://doi.org/10.1016/S0006-291X(02)00577-6)  
515 (2002).

- 516 34 Freitas-Rodríguez, S., Folgueras, A. R. & López-Otín, C. The role of matrix metalloproteinases  
517 in aging: Tissue remodeling and beyond. *Biochimica et Biophysica Acta (BBA) - Molecular Cell*  
518 *Research* **1864**, 2015-2025, doi:<https://doi.org/10.1016/j.bbamcr.2017.05.007> (2017).
- 519 35 Atkinson, J. J. *et al.* The role of matrix metalloproteinase-9 in cigarette smoke-induced  
520 emphysema. *American journal of respiratory and critical care medicine* **183**, 876-884,  
521 doi:10.1164/rccm.201005-0718OC (2011).
- 522 36 Kirkland, J. L. & Tchkonja, T. Senolytic drugs: from discovery to translation. *J Intern Med* **288**,  
523 518-536, doi:10.1111/joim.13141 (2020).
- 524 37 Yao, H. *et al.* Cigarette smoke-mediated inflammatory and oxidative responses are strain-  
525 dependent in mice. *Am J Physiol Lung Cell Mol Physiol* **294**, L1174-1186,  
526 doi:10.1152/ajplung.00439.2007 (2008).
- 527 38 Rajendrasozhan, S., Chung, S., Sundar, I. K., Yao, H. & Rahman, I. Targeted disruption of NF-  
528 {kappa}B1 (p50) augments cigarette smoke-induced lung inflammation and emphysema in  
529 mice: a critical role of p50 in chromatin remodeling. *Am J Physiol Lung Cell Mol Physiol* **298**,  
530 L197-209, doi:10.1152/ajplung.00265.2009 (2010).
- 531 39 Sundar, I. K. & Rahman, I. Gene expression profiling of epigenetic chromatin modification  
532 enzymes and histone marks by cigarette smoke: implications for COPD and lung cancer. *Am J*  
533 *Physiol Lung Cell Mol Physiol* **311**, L1245-L1258, doi:10.1152/ajplung.00253.2016 (2016).
- 534 40 Sundar, I. K. *et al.* Genetic ablation of histone deacetylase 2 leads to lung cellular senescence  
535 and lymphoid follicle formation in COPD/emphysema. *FASEB J* **32**, 4955-4971,  
536 doi:10.1096/fj.201701518R (2018).

537

538

## 539 FIGURES

540

541 **Figure 1**

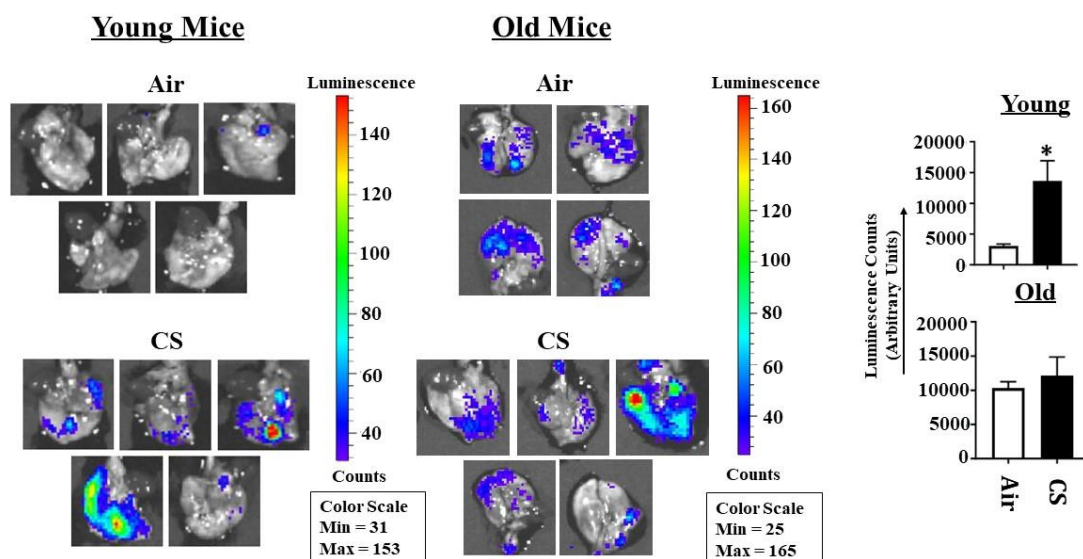

541

542 **Figure 1: Detection of cellular senescence using tissue luminescence in the lungs of CS-**  
543 **exposed p16-3MR mice.** Young and old p16-3MR mice were subjected to sub-chronic (30  
544 days) CS exposure. The lung tissues from air- and CS-exposed mice were harvested and the  
545 lung tissue luminescence was measured using IVIS® Spectrum multispectral imaging  
546 instrument. Data was normalized using the tissue luminescence from the lung tissues of wild-  
547 type (C57BL/6J) mice. Representative images of tissue luminescence from each sample were  
548 provided and the quantified luminescence counts from each sample plotted alongside. Data are  
549 shown as mean  $\pm$  SEM (n = 4–5/group). \* p < 0.05; vs Air as per Student's t-test for pairwise  
550 comparisons.  
551

**Figure 2**

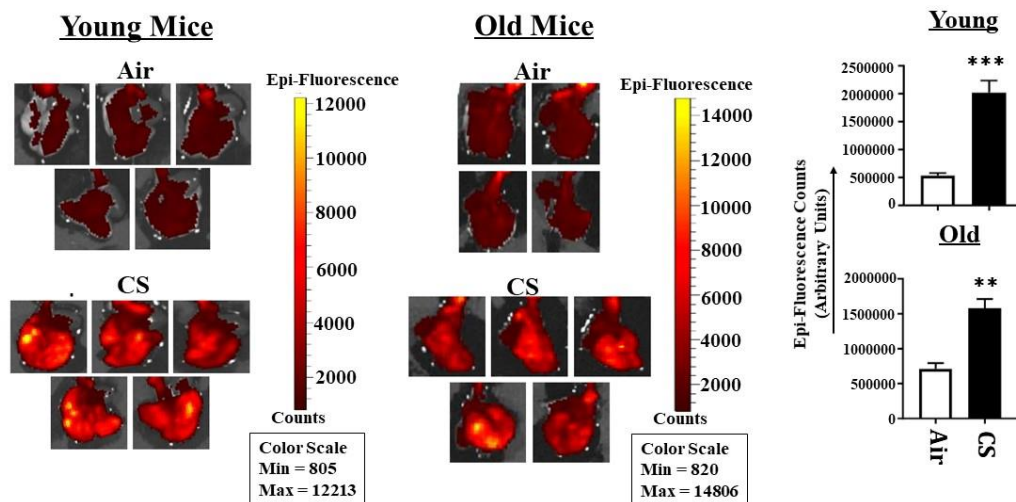

552  
553 **Figure 2: Tissue fluorescence in the lungs of CS-exposed young and old p16-3MR mice**  
554 **using IVIS imaging.** Young and old p16-3MR mice were subjected to sub-chronic (30 days)  
555 CS exposure. The lung tissues from air- and CS-exposed mice were harvested and the lung  
556 tissue fluorescence was measured using IVIS® Spectrum multispectral imaging instrument at  
557 excitation and emission maximum of 535 and 580 nm respectively. Data was normalized using  
558 the tissue luminescence from the lung tissues of wild-type (C57BL/6J) mice. Representative

559 images of  $n = 4-5$ /group were provided and the quantified fluorescence counts plotted as mean  
560  $\pm$  SEM.  $**p < 0.01$ ,  $***p < 0.001$ ; vs Air as per Student's t-test for pairwise comparisons.  
561

**Figure 3**

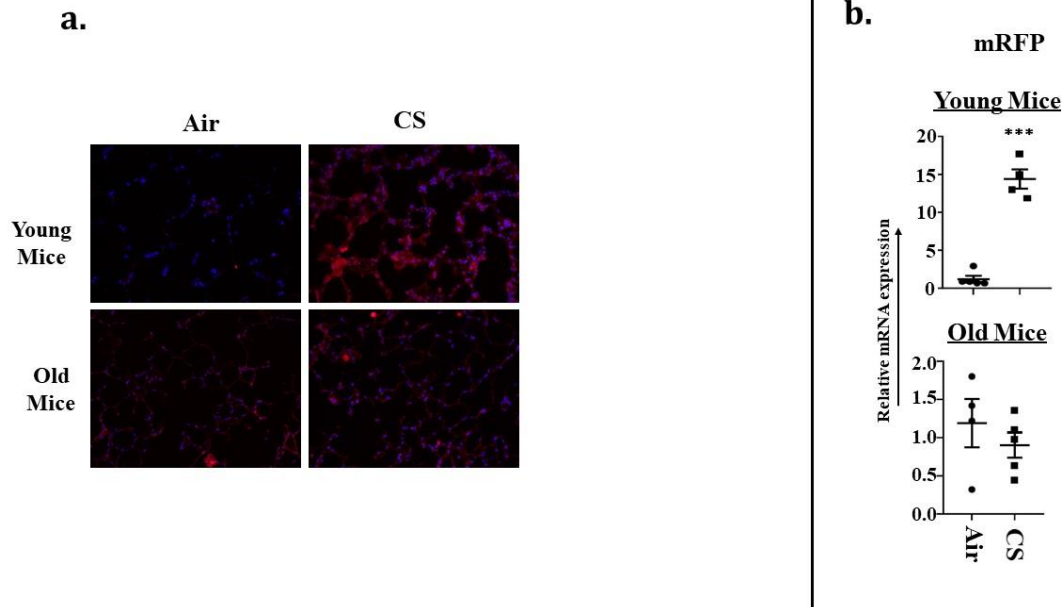

562

563 **Figure 3: Senescent cells observed in lung tissues from CS-exposed p16-3MR mice by**  
564 **fluorescence microscopy.** (a) Lung tissue sections from air and CS-exposed younger and older  
565 p16-3MR mice were stained with DAPI and tissue fluorescence (mRFP) was observed using  
566 Nikon Eclipse Ni-U microscope. Representative images of  $n=4-5$ /group were provided.  
567 Original magnification, x200. (b) mRNA expression of mRFP in the lung tissue was examined  
568 by qPCR. Bar graphs represent the mean normalized fold change of respective air- vs. CS-  
569 exposed mouse lungs using  $\Delta\Delta$ Ct method. Data are shown as mean  $\pm$  SEM ( $n = 4-5$ /group).  
570  $***p < 0.001$ , vs Air as per Student's t-test for pairwise comparisons.

571

**Figure 4**

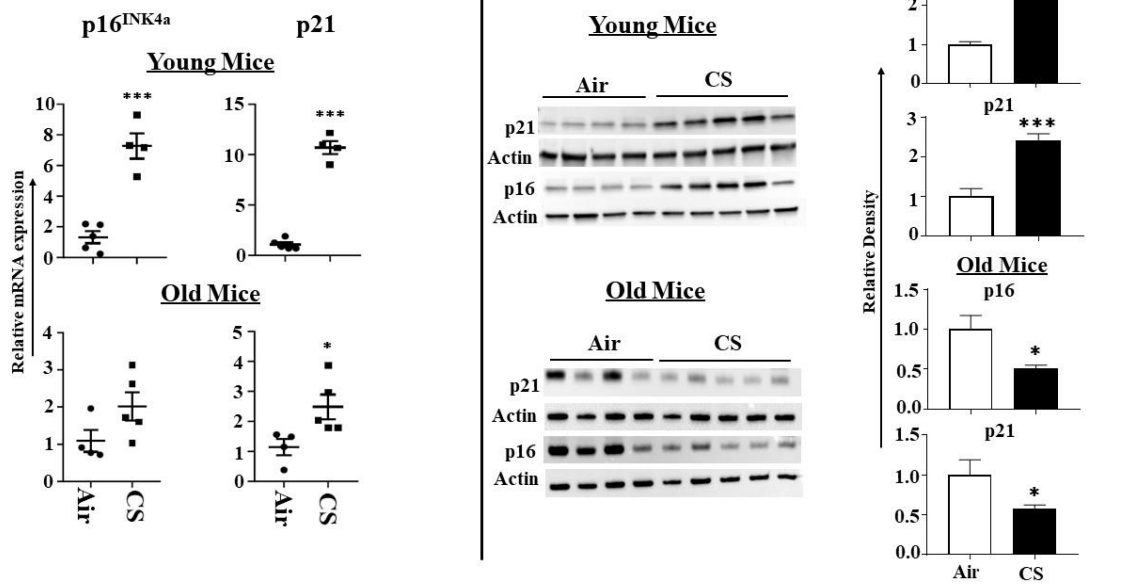

572

573 **Figure 4: Increased transcriptional and translational expression of senescence markers**

574 **in CS-exposed p16-3MR mice.** Younger and older mice were exposed to sub-chronic CS for

575 30 days. (a) mRNA and (b) protein expressions of early- (p21) and late-stage (p16) senescence

576 markers were measured in the lungs homogenates using qPCR and immunoblotting analyses

577 respectively.  $\beta$ -actin/Tubulin was used as loading controls. (c) The band intensity was measured

578 by densitometry and data were shown as fold change relative to respective control group. Full

579 Gels/blots with bands (unedited/uncropped electrophoretic gels/blots) obtained from air- and

580 CS-exposed younger and older mouse samples from the same experiments were processed in

581 parallel are shown (see Supplementary information as Suppl Figs. 3-4). Data are shown as

582 mean  $\pm$  SEM (n = 4–5/group). \* $p < 0.05$ , \*\*\* $p < 0.001$  vs Air as per Student's t-test for pairwise

583 comparisons.

584

## Figure 5

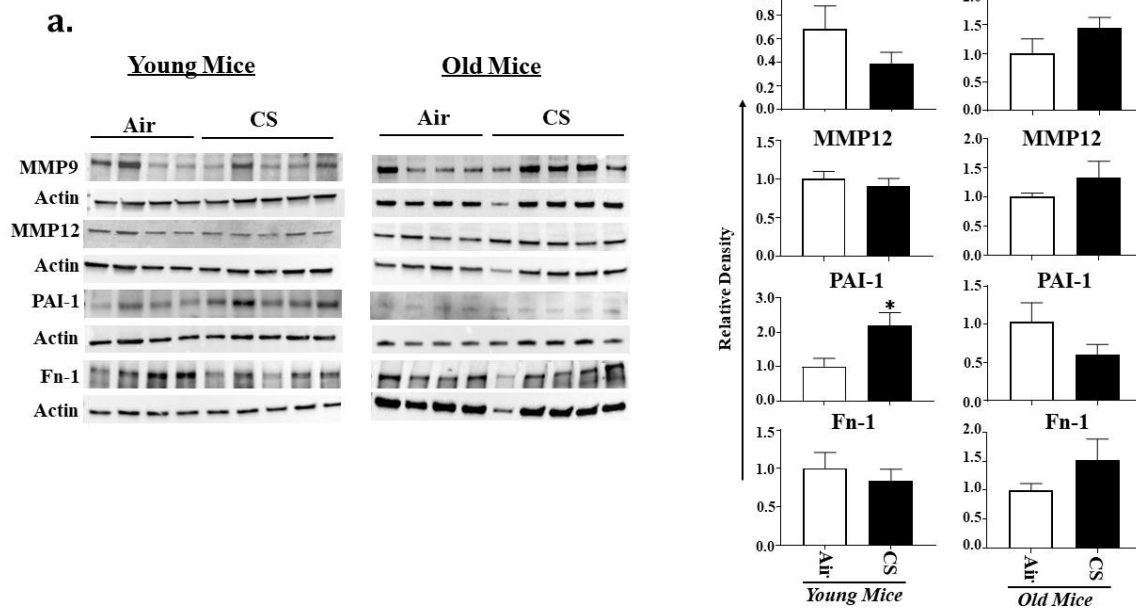

585

586 **Figure 5: Altered protein abundance of SASP-associated markers in CS-exposed p16-**  
587 **3MR mice.**

588 (a) Younger and older p16-3MR mice were exposed to sub-chronic CS for 30 days and the  
589 expression of SASP-associated markers MMP9, MMP12, PAI-1 and FN-1-were determined  
590 using immunoblotting analyses.  $\beta$ -actin was used as loading controls. (b) The band intensity  
591 was measured by densitometry and data were shown as fold change relative to respective  
592 control group. Full Gels/blots with bands (unedited/uncropped electrophoretic gels/blots)  
593 obtained from air- and CS-exposed younger and older mouse samples from the same  
594 experiments were processed in parallel are shown (see Supplementary information as Suppl  
595 Figs. 5-8). Data are shown as mean  $\pm$  SEM (n = 4–5/group). \* $p < 0.05$  vs Air as per Student's  
596 t-test for pairwise comparisons.

597



## Figure 6

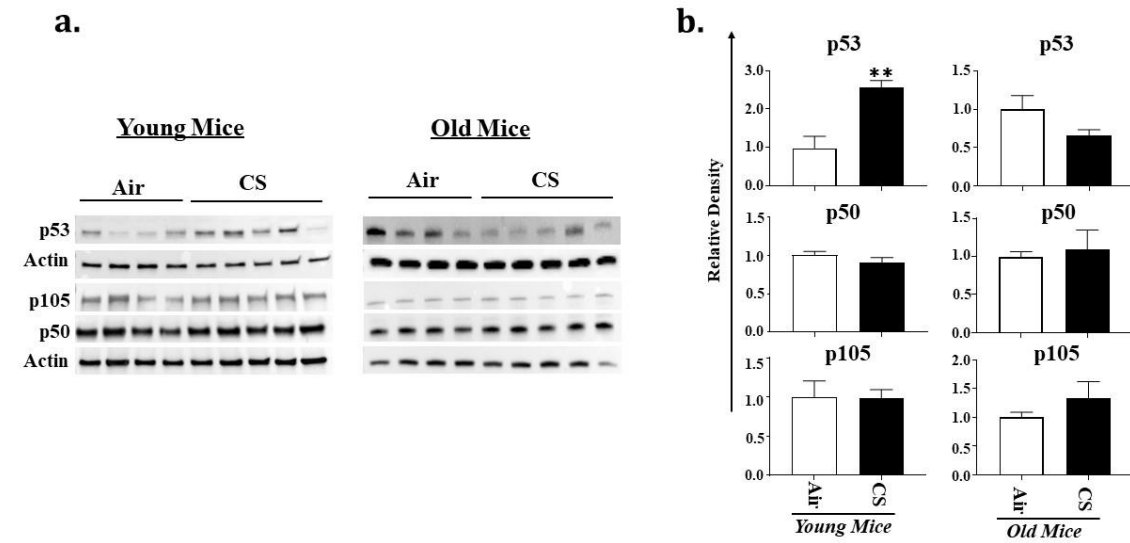

598

599 **Figure 6: Altered expression of senescence and inflammatory marker in CS-exposed p16-**

600 **3MR mice.** (a) Younger and older p16-3MR mice were exposed to sub-chronic CS for 30 days

601 and the expression of marker for cellular senescence (p53) and inflammation (p50 & p105) was

602 determined using immunoblotting analyses.  $\beta$ -actin was used as loading controls. (b) The band

603 intensity was measured by densitometry and data were shown as fold change relative to

604 respective control group. Full Gels/blots with bands (unedited/uncropped electrophoretic

605 gels/blots) obtained from air- and CS-exposed younger and older mouse samples from the same

606 experiments were processed in parallel are shown (see Supplementary information as Suppl

607 Figs. 9-10). Data are shown as mean  $\pm$  SEM (n = 4–5/group). \* $p < 0.05$  vs Air as per Student's

608 t-test for pairwise comparisons.

609

Figure 7

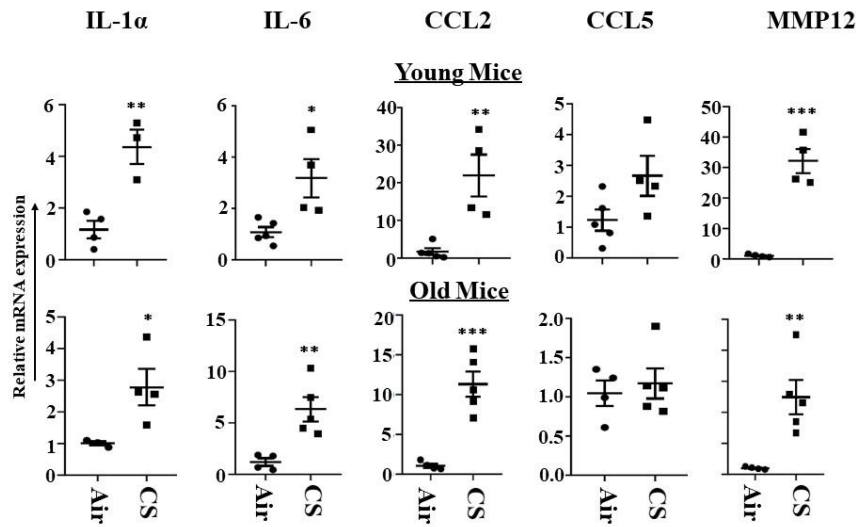

610

611 **Figure 7: Increased mRNA expression of SASP-associated markers in CS-exposed p16-**

612 **3MR mice.** mRNA expression of SASP associated markers (IL-1α, IL6, CCL2, CCL5 and

613 MMP12) were measured in the lung tissues from air- and CS-exposed young and old p16-3MR

614 mice. Bar graphs represent the mean normalized fold change of respective air- vs. CS-exposed

615 mouse lungs using  $\Delta\Delta C_t$  method. Data are shown as mean  $\pm$  SEM (n = 4–5/group). \*p < 0.05,

616 \*\*p < 0.01, \*\*\*p < 0.001 vs Air as per Student's t-test for pairwise comparisons.

617

**Figure 8**

**a.**

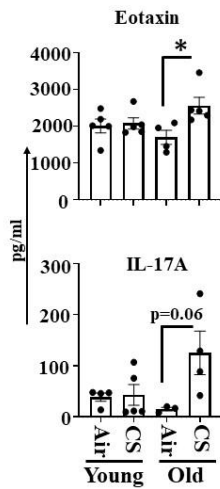

**b.**

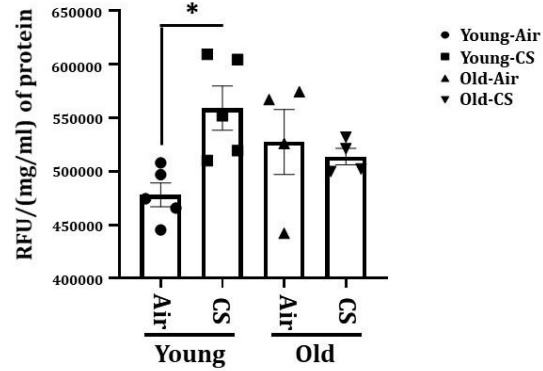

618

619 **Figure 8: Increased level of plasma cytokines and SA-β-gal activity in CS-exposed p16-**

620 **3MR mice.** Younger and older p16-3MR mice were exposed to sub-chronic CS for 30 days

621 and plasma was used to determine SASP cytokines. **(a)** The level of pro-inflammatory plasma

622 cytokines (eotaxin and IL-17A) were measured using Luminex multiplex assay. **(b)** SA-β-gal

623 activity was determined in lung homogenates. Data are shown as mean ± SEM (n = 4–5/group).

624 \* $p < 0.05$ , \*\* $p < 0.01$ , \*\*\* $p < 0.001$  vs Air as per Student's t-test for pairwise comparisons.

625

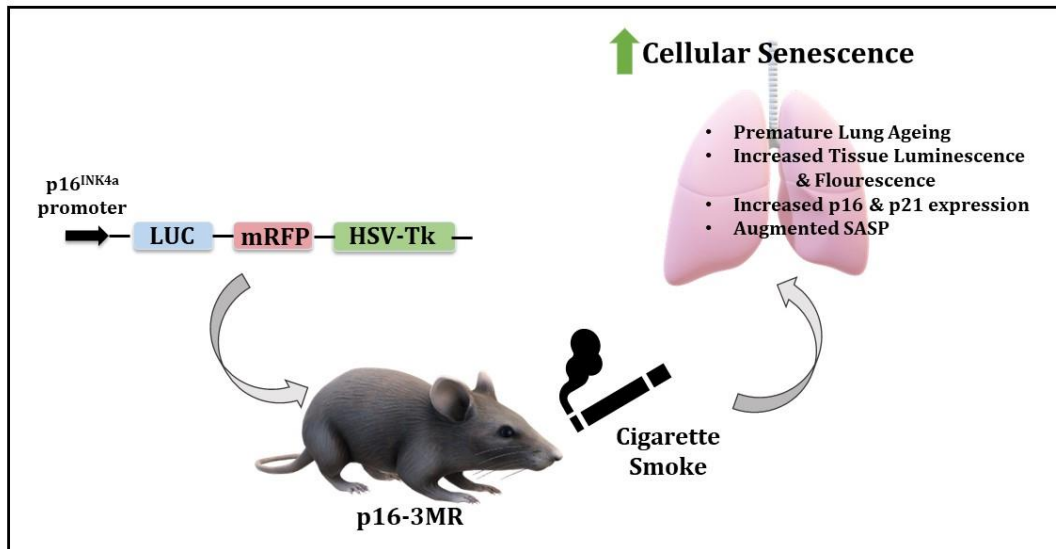

626

627 **Figure 9:** Schematics of the model and observed outcomes as shown using the p16-3MR mice

628 exposed to cigarette smoke for cellular senescence.
